# Supplementary material
Source: Springer Nature journal article supplement (https://www.springermedizin.de/resource/supplementary/12936_2007_632_MOESM4_ESM.pdf/9547864)

HZ  
 HETE 0.1  $\mu$ M  
 HETE 1  $\mu$ M  
 HETE 10  $\mu$ M

|   |   |   |   |   |
|---|---|---|---|---|
| - | + | - | - | - |
| - | - | + | - | - |
| - | - | - | + | - |
| - | - | - | - | + |

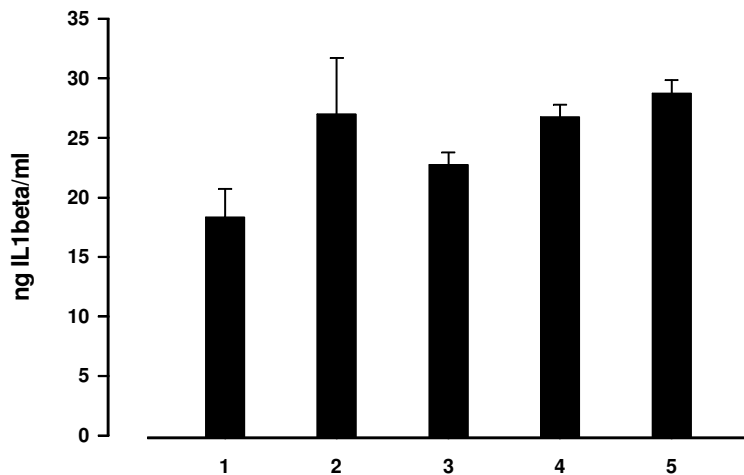

**A**

HZ  
 HETE 0.1  $\mu$ M  
 HETE 1  $\mu$ M  
 HETE 10  $\mu$ M

|   |   |   |   |   |
|---|---|---|---|---|
| - | + | - | - | - |
| - | - | + | - | - |
| - | - | - | + | - |
| - | - | - | - | + |

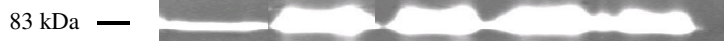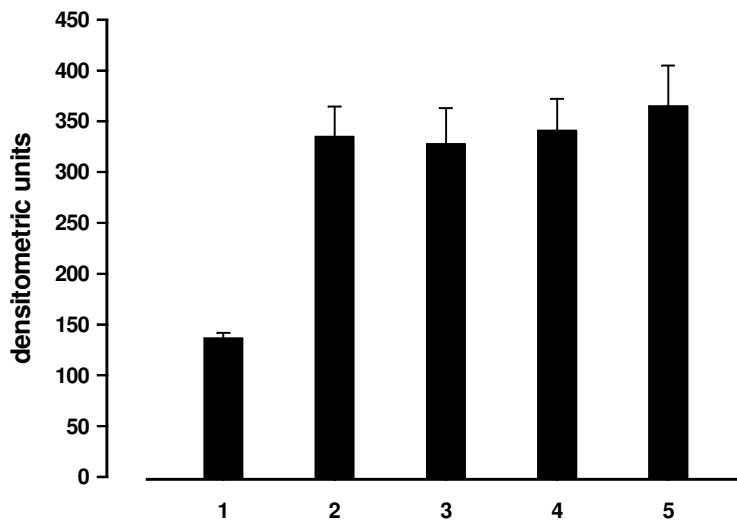

**B**

Supplement: MOESM4 [file 9547864]
